# Supplementary material for: The scaffold protein Tks4 is required for the differentiation of mesenchymal stromal cells (MSCs) into adipogenic and osteogenic lineages
Source: PubMed Central journal article supplement (PMC5053279; doi:10.1038/srep34280), 2016-10-06
Supplement: srep34280-s1.pdf [file srep34280-s1.pdf]

The scaffold protein Tks4 is required for the differentiation of mesenchymal stromal cells (MSCs) into adipogenic and osteogenic lineages

M. Dülk, Gy. Kudlik, A. Fekete, D. Ernszt, K. Kvell, J. E. Pongrácz, B. L. Merő, B. Szeder, L. Radnai, M. Geiszt, D. E. Csécsy, T. Kovács, F. Uher, Á. Lányi, V. Vas and L. Buday

Supplementary table S1.

Comparison of the phenotype of our Tks4<sup>-/-</sup> mouse to other Tks4<sup>-/-</sup> mice established in other strains and with different strategies

|                                      | Tks4 <sup>-/-</sup> mice (C57 Bl6 strain)                 | "nee" mice( B10.A-H2h4/(4R)SgDvEg strain) <sup>16</sup> | Sh3pxd2b null mice (mixed background) <sup>3</sup> |
|--------------------------------------|-----------------------------------------------------------|---------------------------------------------------------|----------------------------------------------------|
| <b>mutation in SH3PXD2b gene:</b>    | deleted 5th and 6th exons resulted in frameshift mutation | frameshift mutation in exon 13.                         | insertion between 3rd and 4th exons                |
| <b>smaller body size</b>             | observed                                                  | observed                                                | observed                                           |
| <b>retardation in movements:</b>     | observed                                                  | not tested                                              | not tested                                         |
| <b>prominent forehead:</b>           | observed                                                  | observed                                                | observed                                           |
| <b>prominent deformed eyes:</b>      | observed                                                  | observed                                                | observed                                           |
| <b>congenital glaucoma:</b>          | not tested                                                | cloudy cornea                                           | observed                                           |
| <b>shorter nasal bone:</b>           | observed                                                  | observed                                                | observed                                           |
| <b>cardiac deficiencies :</b>        | not tested                                                | not tested                                              | observed                                           |
| <b>bowing, shortened long bones:</b> | observed                                                  | shortened bones                                         | not bowing                                         |
| <b>kyphosis</b>                      | observed                                                  | observed                                                | observed                                           |
| <b>reduced bone mineral density:</b> | not tested                                                | observed                                                | not tested                                         |
| <b>less adipose tissue:</b>          | observed                                                  | observed                                                | observed                                           |
| <b>fertility:</b>                    | infertile                                                 | infertile                                               | not tested                                         |
| <b>hearing deficiency:</b>           | not tested                                                | observed                                                | observed                                           |
