# Supplementary material for: The scaffold protein Tks4 is required for the differentiation of mesenchymal stromal cells (MSCs) into adipogenic and osteogenic lineages
Source: PubMed Central journal article supplement (PMC5053279; doi:10.1038/srep34280), 2016-10-06
Supplement: srep34280-s2.pdf [file srep34280-s2.pdf]

**The scaffold protein Tks4 is required for the differentiation of mesenchymal stromal cells (MSCs) into adipogenic and osteogenic lineages**

M. Dülk, Gy. Kudlik, A. Fekete, D. Ernszt, K. Kvell, J. E. Pongrácz, B. L. Meró, B. Szeder, L. Radnai, M. Geiszt, D. E. Csécsy, T. Kovács, F. Uher, Á. Lányi, V. Vas and L. Buday

**Supplementary table S2.**

**List of examined genes of the adipo-differentiated MSCs including gene symbols, short description of the gene functions and assay IDs used by TaqMan Array Plates30.**

| <b>Gene symbols:</b>                                      | <b>Descriptions:</b>                                          | <b>Assay ID</b> |
|-----------------------------------------------------------|---------------------------------------------------------------|-----------------|
| <b>Transcription factors:</b>                             |                                                               |                 |
| Srebf1                                                    | Sterol regulatory element binding transcription factor 1      | Mm01138344_m1   |
| Lxra                                                      | Nr1h3<br>Liver X Receptor-Alpha,                              | Mm00443451_m1   |
| Ppard                                                     | NR1C2<br>Peroxisome Proliferator Activator Receptor delta     | Mm01305433_m1   |
| Pparg                                                     | NR1C3<br>Peroxisome Proliferator Activated receptor gamma     | Mm01184322_m1   |
| <b>Sterol metabolism:</b>                                 |                                                               |                 |
| Abca1                                                     | CERB<br>ATP-binding cassette transporter A1                   | Mm01350760_m1   |
| Lpl                                                       | Lipoprotein Lipase                                            | Mm00434770_m1   |
| Cd36                                                      | Cd36 scavenger receptor                                       | Mm00432403_m1   |
| Hmgcs1                                                    | HMG-CoA-Synthase 1                                            | Mm00524111_m1   |
| Insig1                                                    | Insulin induced gene 1                                        | Mm00463389_m1   |
| Stard4                                                    | START domain containing 4                                     | Mm00505395_m1   |
| Acat1                                                     | MAT<br>Acetyl-Coenzyme A acetyltransferase 1                  | Mm00507463_m1   |
| <b>Fatty acid metabolism and lipid droplet formation:</b> |                                                               |                 |
| GK                                                        | Glycerol Kinase                                               | Mm00433896_m1   |
| Acadvl                                                    | Acyl-Coenzyme A dehydrogenase, very long chain                | Mm00444296_m1   |
| FABP4                                                     | ALBP<br>Fatty acid binding protein 4                          | Mm00445878_m1   |
| FABP5                                                     | EFABP<br>Fatty acid binding protein 5                         | Mm00783731_s1   |
| FADS1                                                     | LLCDL1<br>Fatty acid desaturase 1                             | Mm00507605_m1   |
| FADS2                                                     | LLCDL2<br>Fatty acid desaturase 2                             | Mm00517221_m1   |
| FADS3                                                     | LLCDL3<br>Fatty acid desaturase 3                             | Mm00517643_m1   |
| Scd1                                                      | FADS5<br>Stearoyl-CoA desaturase                              | Mm00772290_m1   |
| Hadhb                                                     | MTPB<br>Hydroxyacyl-Coenzyme A dehydrogenase beta subunit     | Mm00523880_g1   |
| Ucp2                                                      | BMIQ4<br>Uncoupling protein 2                                 | Mm00627599_m1   |
| Adfp                                                      | Plin2<br>Adipose Differentiation-Related Protein, Adipophilin | Mm00475794_m1   |
| Pla2g4a                                                   | CPLA2<br>Phospholipase A2, group IVA                          | Mm00447040_m1   |
| Ltc4s                                                     | Leukotriene C4 synthase                                       | Mm00521864_m1   |
| Alox12                                                    | Arachidonate 12-lipoxygenase                                  | Mm00545833_m1   |
| Alox5ap                                                   | FLAP<br>Arachidonate 5-lipoxygenase-activating protein        | Mm00802100_m1   |
